# Supplementary material for: Immunophenotypic characterization of reactive and neoplastic plasmacytoid dendritic cells permits establishment of a ten-color flow cytometric panel for initial workup and residual disease evaluation of blastic plasmacytoid dendritic cell neoplasm
Source: PubMed Central journal article supplement — Haematologica. 2020 Apr 2;106(4):1047–55. doi: 10.3324/haematol.2020.247569 (PMC8017819; doi:10.3324/haematol.2020.247569), 2020-04-02
Supplement: 2020_247569-Disclosures_Contributions.pdf [file 2020_247569-Disclosures_Contributions.pdf]

Haematologica  
HAEMATOL/2020/247569  
Version 3

Immunophenotypic characterization of reactive and neoplastic plasmacytoid dendritic cells permits establishment of a 10-color flow cytometric panel for initial workup and residual disease evaluation of blastic plasmacytoid dendritic cell neoplasm

Wei Wang, Joseph D. Khoury, Roberto N. Miranda, Jeffrey L. Jorgensen, Jie Xu, Sanam Loghavi, Shaoying Li, Naveen Pemmaraju, Than Nguyen, L. Jeffrey Medeiros, and Sa A. Wang

Disclosures: none

Contributions: WW and SAW designed and wrote the experiments. JX, SL, SL, TN performed the experiment. JDK, RNM, JLJ, NP and LJM offered suggestions, write and reviewed the manuscript.
