# Supplementary material for: Immunophenotypic characterization of reactive and neoplastic plasmacytoid dendritic cells permits establishment of a ten-color flow cytometric panel for initial workup and residual disease evaluation of blastic plasmacytoid dendritic cell neoplasm
Source: PubMed Central journal article supplement — Haematologica. 2020 Apr 2;106(4):1047–55. doi: 10.3324/haematol.2020.247569 (PMC8017819; doi:10.3324/haematol.2020.247569), 2020-04-02
Supplement: 2020_247569_WANG_SUPPL.pdf [file 2020_247569_WANG_SUPPL.pdf]

## Immunophenotypic characterization of reactive and neoplastic plasmacytoid dendritic cells permits establishment of a ten-color flow cytometric panel for initial workup and residual disease evaluation of blastic plasmacytoid dendritic cell neoplasm

Wei Wang,<sup>1</sup> Joseph D. Khoury,<sup>1</sup> Roberto N. Miranda,<sup>1</sup> Jeffrey L. Jorgensen,<sup>1</sup> Jie Xu,<sup>1</sup> Sanam Loghavi,<sup>1</sup> Shaoying Li,<sup>1</sup> Naveen Pemmaraju,<sup>2</sup> Than Nguyen,<sup>1</sup> L. Jeffrey Medeiros<sup>1</sup> and Sa A. Wang<sup>1</sup>

<sup>1</sup>Department of Hematopathology, The University of Texas MD Anderson Cancer Center, and <sup>2</sup>Department of Leukemia, The University of Texas MD Anderson Cancer Center, Houston, TX, USA

©2021 Ferrata Storti Foundation. This is an open-access paper. doi:10.3324/haematol.2020.247569

Received: January 16, 2020.

Accepted: March 26, 2020.

Pre-published: April 2, 2020.

Correspondence: WEI WANG - [wwang13@mdanderson.org](mailto:wwang13@mdanderson.org)

SA A. WANG - [swang5@mdanderson.org](mailto:swang5@mdanderson.org)

---

**Supplementary Fig 1:** A case illustration of BPDCN gating and analysis strategy using CD123. CD123/low SSC cells are 0.30% of total nucleated events after removing doublets, debris, platelets and red blood cells, and these cells are reflected on CD45/SSC plot. CD123+/low SSC and HLA-DR+ cells are plasmacytoid dendritic cells (PDC), comprising 0.07% of total events. The CD123+HLADR- cells are basophils. The neoplastic PDCs are highlighted in red and normal PDC are in blue.

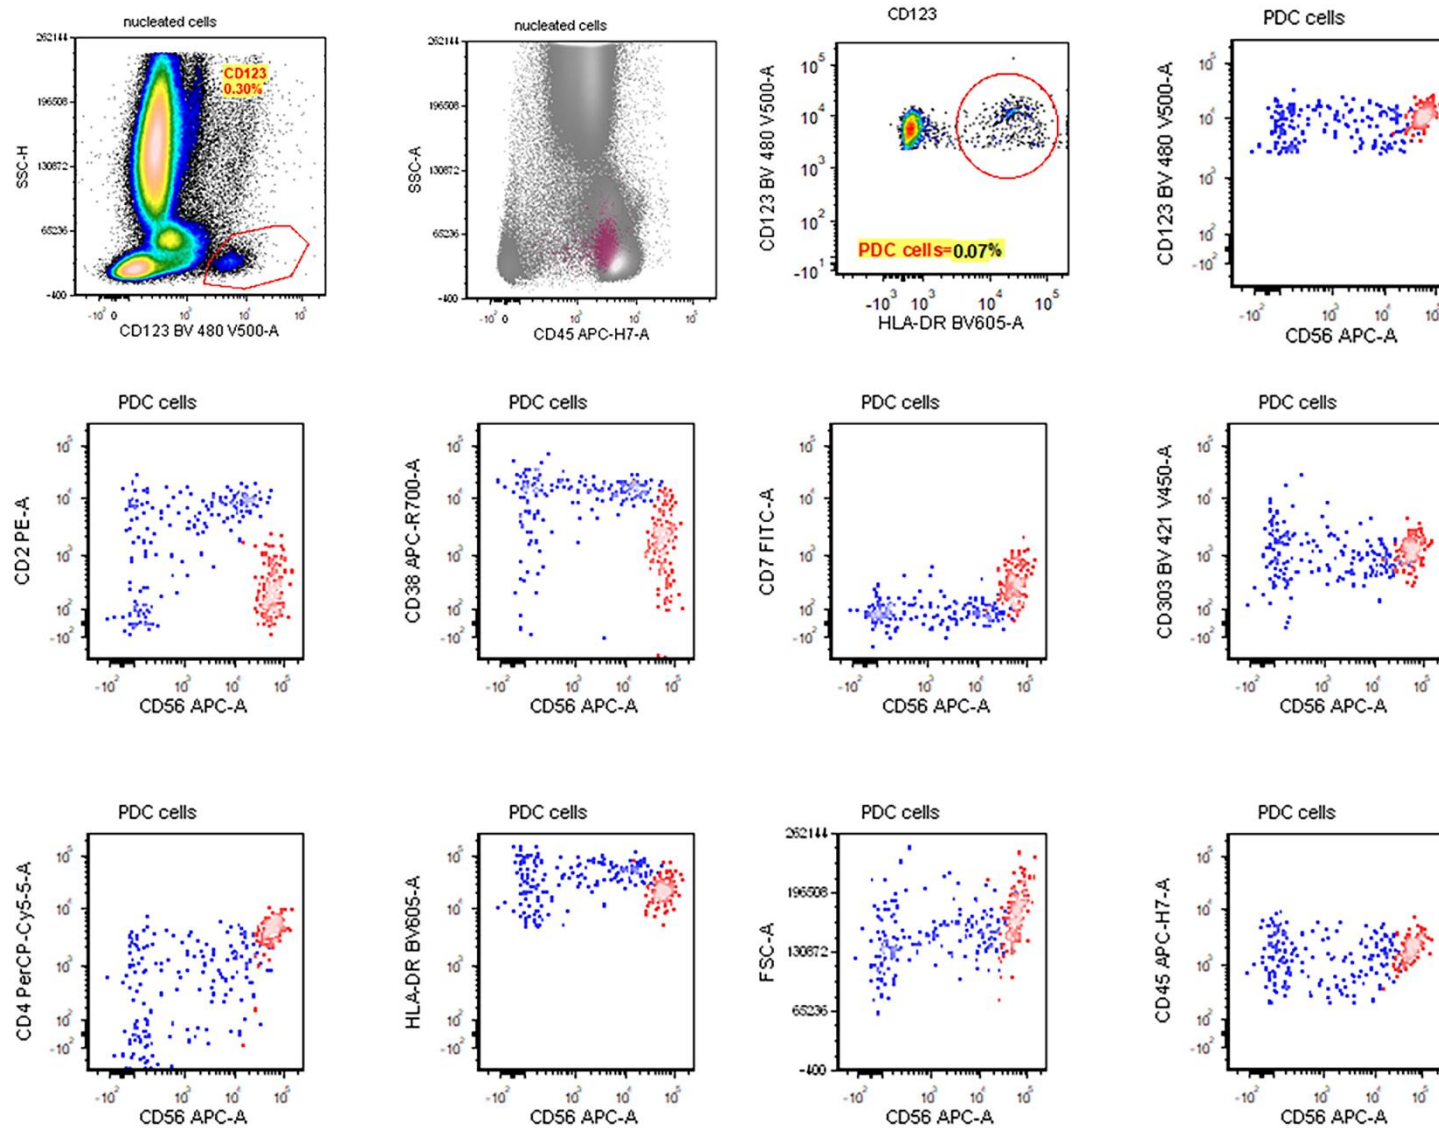

**Supplementary Fig 2:** A case illustration of BPDCN gating and analysis strategy using CD56+/CD64-. An alternative gating strategy is also applied in all cases, considering the possibility of loss or down regulation of CD123 post anti-CD123 treatment. The CD56+HLADR+CD64-negative are analyzed. The CD56+HLADR- cells are mostly NK cells, as reflected on CD45/SSC. The neoplastic PDC are highlighted in red and other CD56+HLADR+CD64- cells are in blue. So far, we have not identified any cases with residual BPDCN showing CD123 loss.

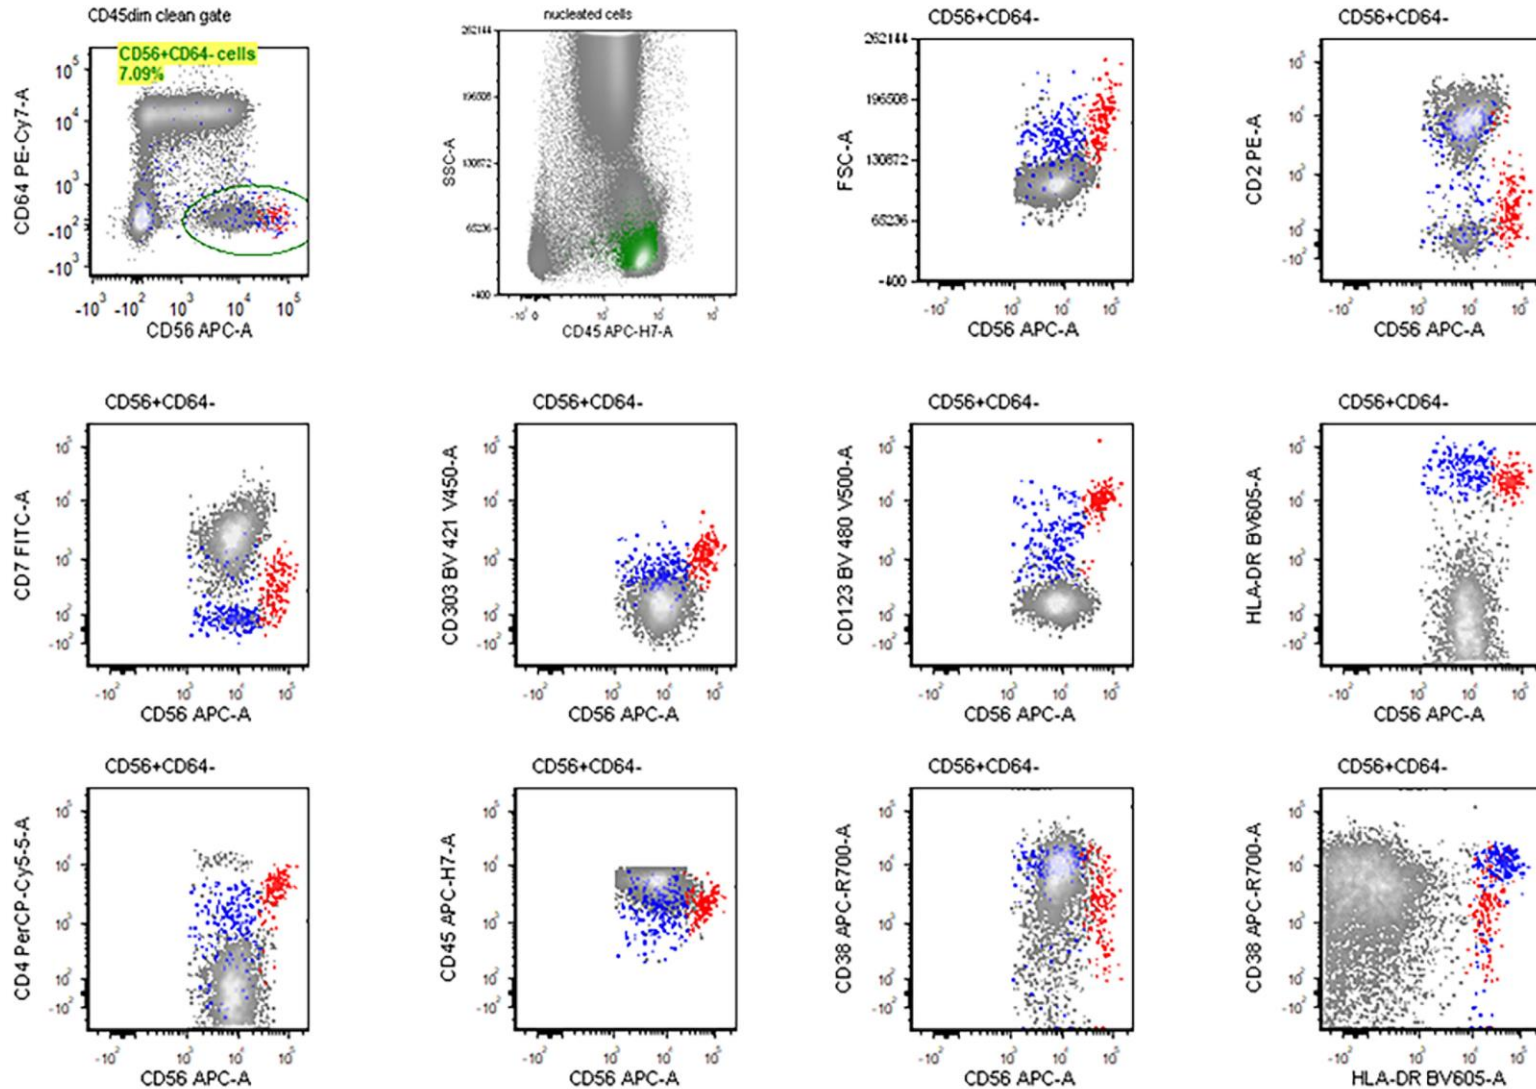

**Supplementary Fig 3:** A representative case with serial dilutions shows the sensitivity of this panel is below 0.01%. Pink cells are neoplastic cells.

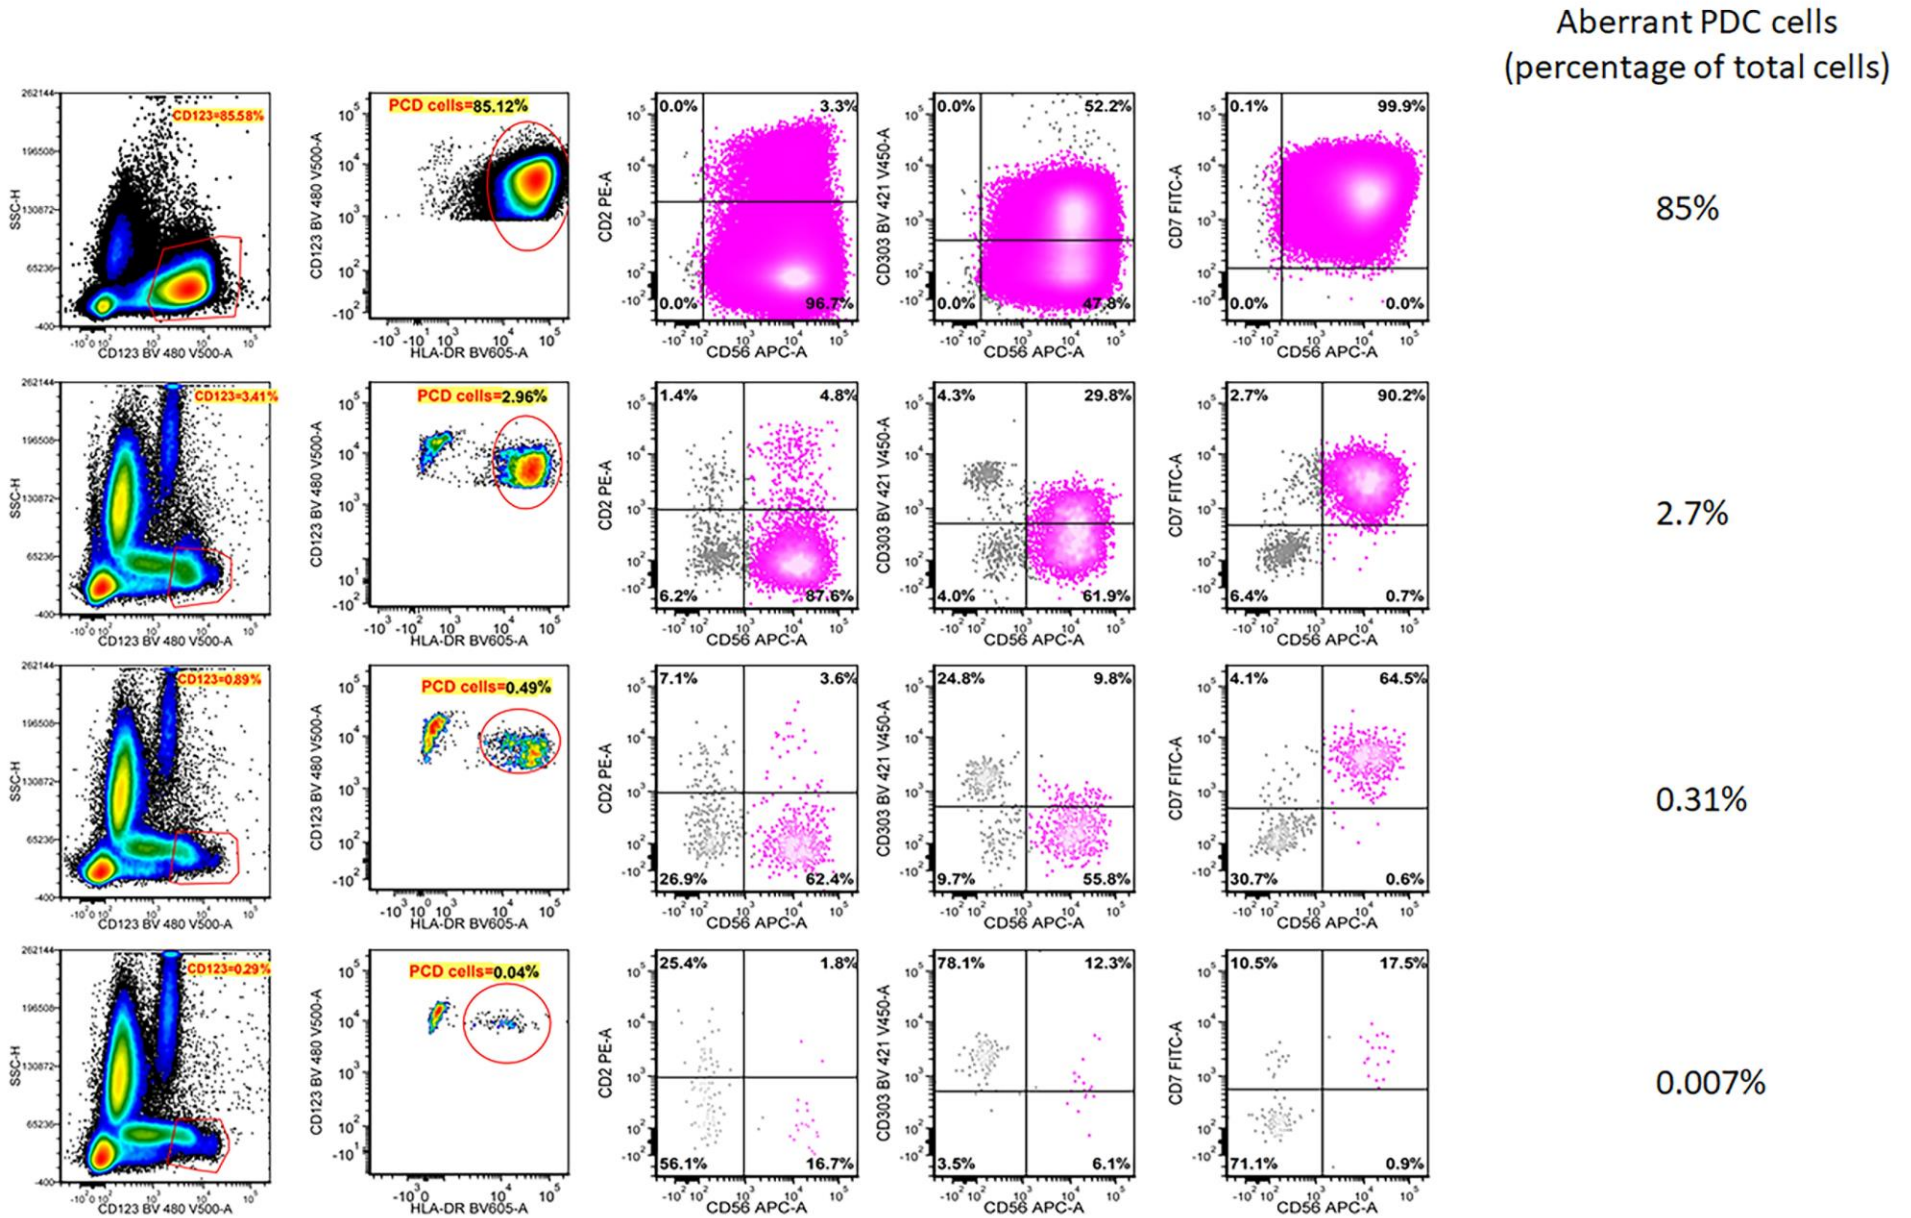

**Supplementary Table 1: The immunophenotype of BPDCN**

| Markers | Positivity (%) |
|---------|----------------|
| CD2     | 19% (5/27)     |
| CD3     | 0% (0/15)      |
| CD4     | 100% (38/38)   |
| CD5     | 3% (1/30)      |
| CD7     | 64% (21/33)    |
| CD13    | 0% (0/30)      |
| CD14    | 3% (1/34)      |
| CD15    | 0% (0/28)      |
| CD19    | 0% (0/30)      |
| CD22    | 0% (0/26)      |
| CD25    | 0% (0/22)      |
| CD33    | 48% (16/33)    |
| CD34    | 0% (0/27)      |
| CD36    | 57% (17/30)    |
| CD38*   | 88% (30/34)    |
| CD41    | 0% (0/12)      |
| CD45    | 100% (39/39)   |
| CD56    | 97% (36/37)    |
| CD64    | 0% (0/36)      |
| CD117*  | 9% (3/34)      |
| CD123*  | 100%(36/36)    |
| CD303*  | 44% (7/16)     |
| HLA-DR* | 100% (36/36)   |
| MPO     | 0%(0/16)       |
| TdT     | 25% (4/16)     |

**Notes: CD38:** Although 88% (30/34) cases were positive, only 18% (6/34) showed a normal CD38 level, whereas 70%(24/34) showed decreased CD38 and 12% (4/34) showed negative; **CD117:** Only 9% (3/34) cases were positive and all were partially positive; **CD123:** Although all cases were positive, 78% (28/36) showed decreased expression; **CD303:** Although 7 out of 16 (44%) cases were positive, only 1 (6%) showed a relatively normal level when compared to reactive PDCs and overall, most cases showed decreased or negative CD303; **HLA-DR:** All cases were positive and 69% (25/36) showed brighter expression when compared to normal/reactive PDCs.

**Supplementary Table 2: The fluorochromes and antibodies used in the newly designed panel (corresponding to Panel #3 in Table 1)**

| Antibody     | CD7  | CD2  | CD4         | CD64   | CD56     | CD38 | CD45   | CD303     | CD123 | HLA-DR |
|--------------|------|------|-------------|--------|----------|------|--------|-----------|-------|--------|
| Fluorochrome | FITC | PE   | PerCP-Cy5.5 | PE-Cy7 | APC      | R700 | APC-H7 | BV421     | BV480 | BV605  |
| Company      | BD   | BD   | BD          | BD     | BD       | BD   | BD     | Biolegend | BD    | BD     |
| Clone #      | 4H9  | S5.2 | SK3         | 10.1   | NCAM16.2 | HB7  | 2D1    | 201A      | 7G3   | G46.6  |
